# Supplementary material for: Cyclosporine a directly affects human and mouse b cell migration in vitro by disrupting a hIF-1 αdependent, o2 sensing, molecular switch
Source: PubMed Central journal article supplement (PMC7079363; doi:10.1186/s12865-020-0342-8), 2020-03-18
Supplement: 12865_2020_342_MOESM1_ESM.pdf [file 12865_2020_342_MOESM1_ESM.pdf]

Additional Files

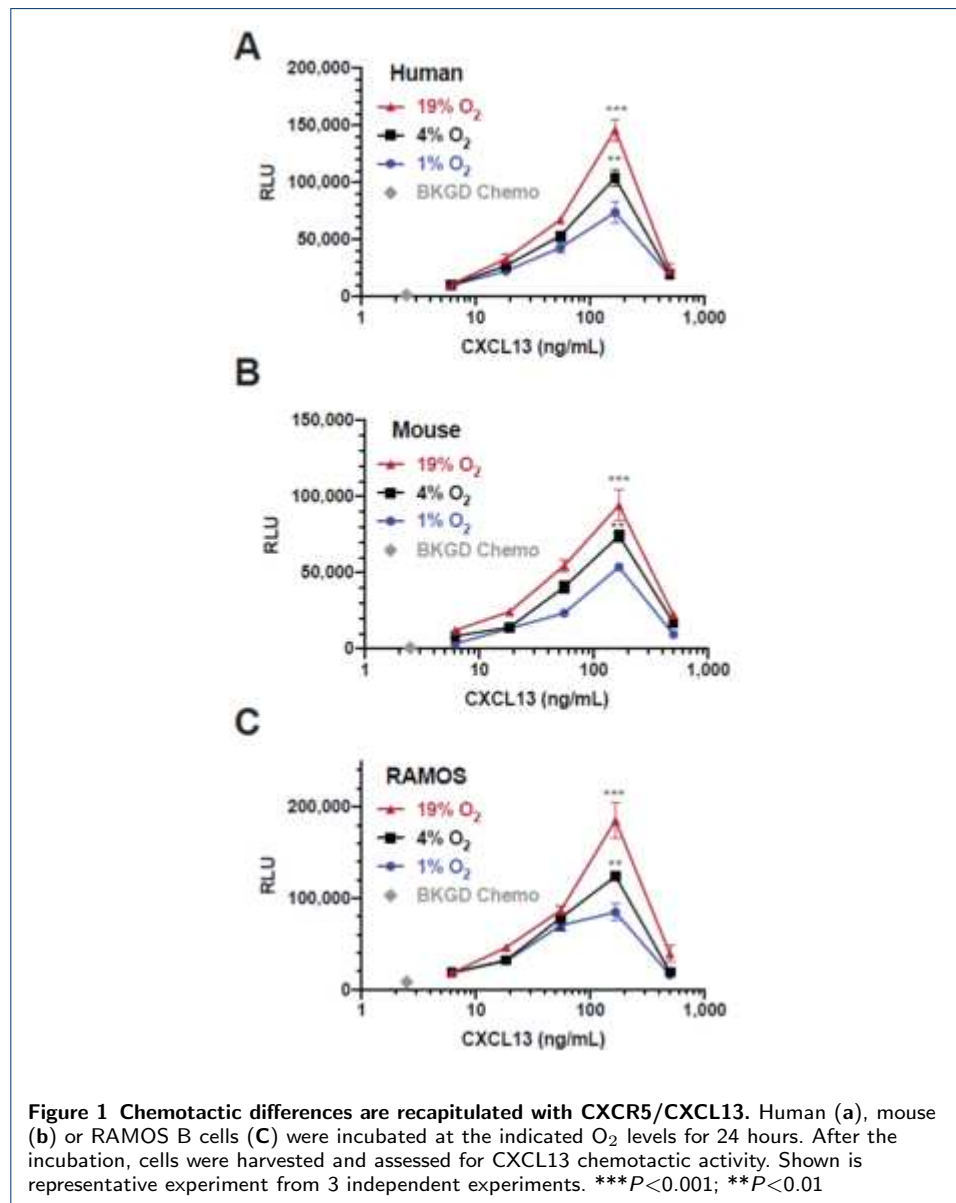

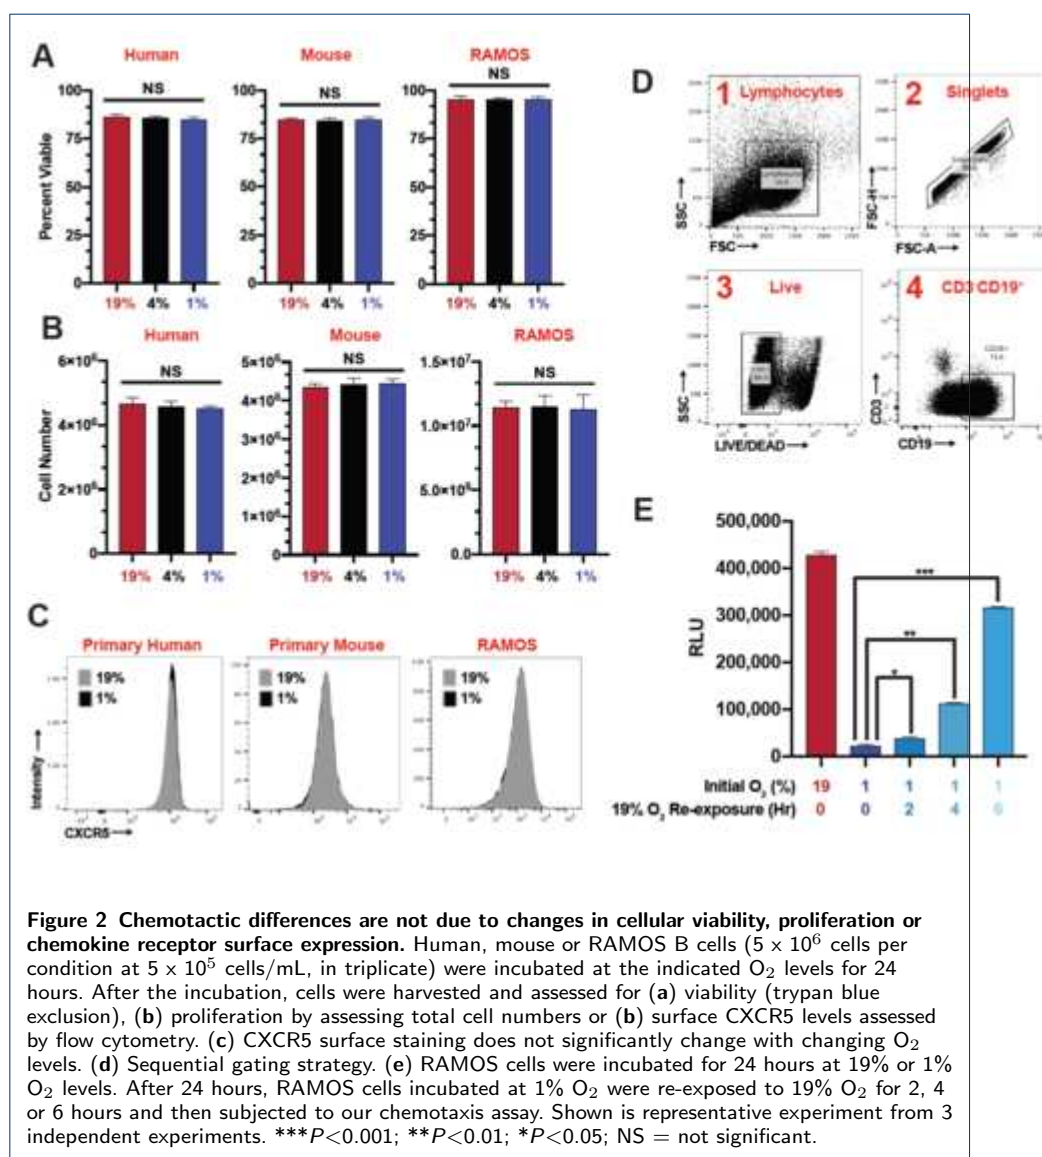

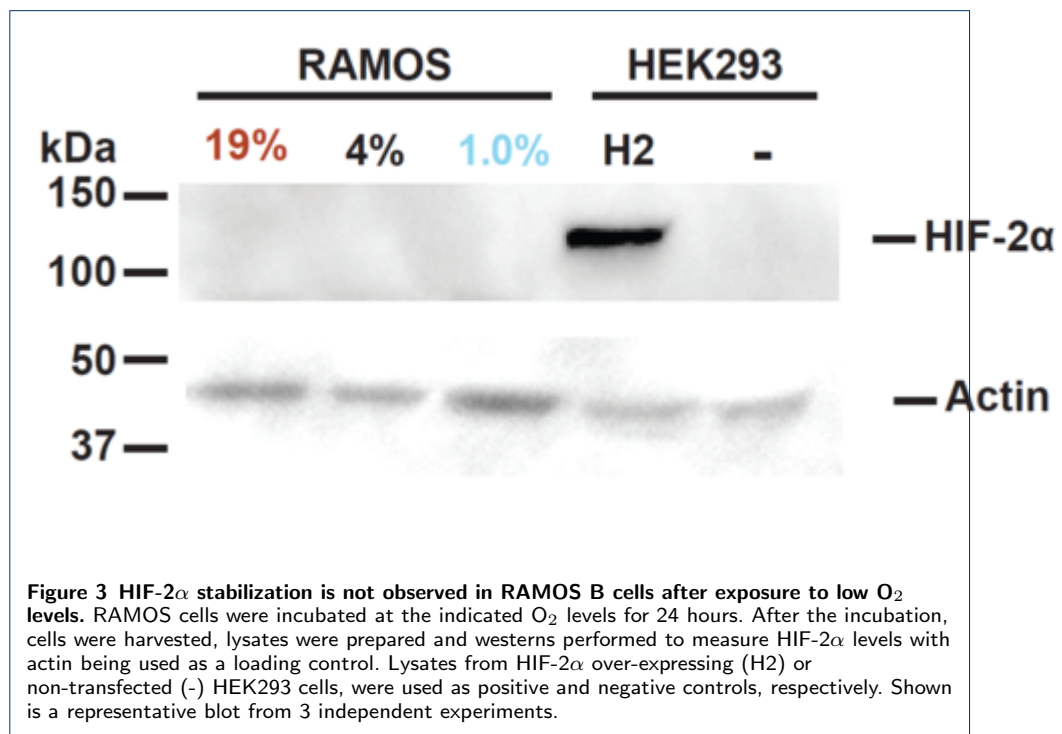

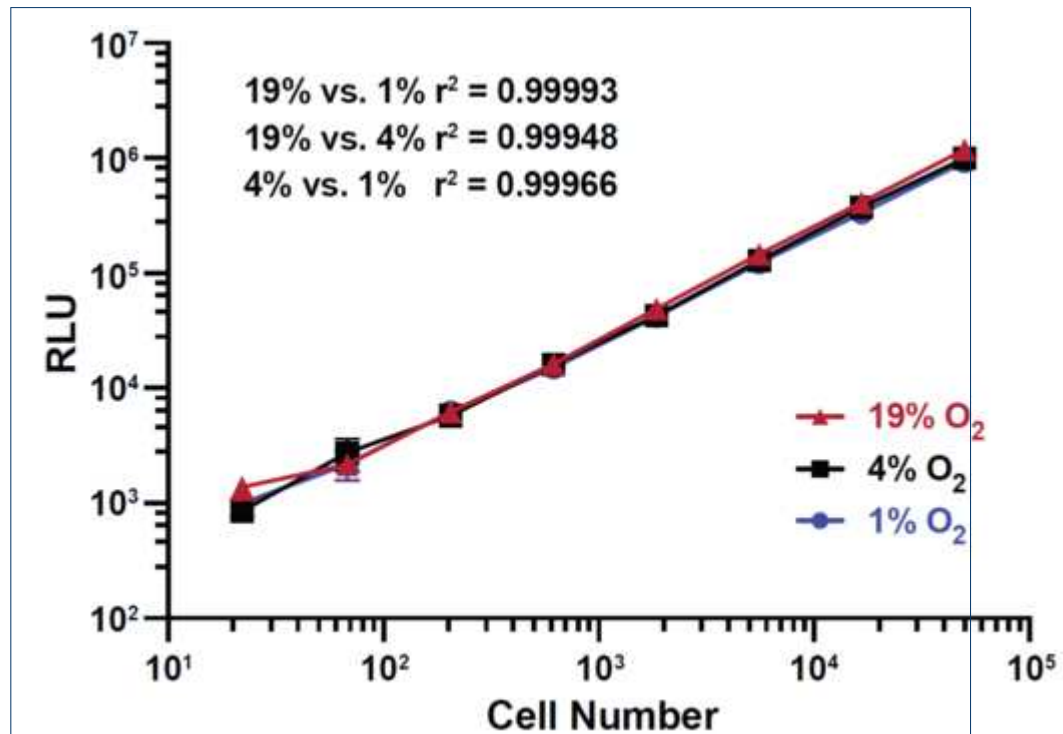

**Figure 4** A direct correlation exists between cell numbers and RLU readout regardless of O<sub>2</sub> levels. RAMOS cells ( $5 \times 10^6$  cells per condition at  $5 \times 10^5$  cells/mL, in triplicate) were incubated at the indicated O<sub>2</sub> levels for 24 hours. After the incubation, cells were harvested and counted. Cells were then plated in triplicate well in 96 well plates at the indicated cell numbers. Plates were then incubated at the original O<sub>2</sub> levels for an additional hour and luminescence was then assessed to mimic the conditions of the chemotaxis assay. assessed for (a) viability (trypan blue exclusion), (b) proliferation by assessing total cell numbers or (c) surface CXCR4 levels assessed by flow cytometry. Shown is representative experiment from 3 independent experiments. Pearson correlation coefficients were calculated using Prism software (GraphPad Software, San Diego, CA; Mac version 8.0.2)
